# Supplementary material for: Human biallelic MFN2 mutations induce mitochondrial dysfunction, upper body adipose hyperplasia, and suppression of leptin expression
Source: eLife. 2017 Apr 19;6:e23813. doi: 10.7554/eLife.23813 (PMC5422073; doi:10.7554/eLife.23813)
Supplement: Figure 3—source data 5. — DOI: http://dx.doi.org/10.7554/eLife.23813.016 [file elife-23813-fig3-data5.xlsx]

## Sheet: Mitochondrial
ENSEMBL	genes	P2 FC	P3 FC	P2 FDR	P3 FDR
ENSG00000237973	hsa-mir-6723	7.81772	8.06923	1.1704e-58	1.84814e-63
ENSG00000210151	J01415.12	-3.98711	-3.08325	5.42999e-09	5.02595e-07
ENSG00000210140	J01415.10	-2.71126	-2.41222	1.97645e-06	9.4493e-06
ENSG00000198786	MT-ND5	-2.56098	-1.95311	3.114e-06	0.0020806
ENSG00000198727	MT-CYB	-3.37858	-2.39886	1.08981e-05	0.00319086
ENSG00000210144	J01415.11	-2.49512	-2.51973	2.13362e-05	6.62235e-05
ENSG00000198888	MT-ND1	-2.60448	-2.20992	0.00014851	0.00271003
ENSG00000198899	MT-ATP6	-2.78116	-2.04419	2.5642e-05	0.00743754
ENSG00000210135	J01415.9	-2.50155	-2.17946	0.00013465	0.00114875
ENSG00000198695	MT-ND6	-2.24653	-1.77832	7.16558e-05	0.0135727
ENSG00000198886	MT-ND4	-2.6311	-1.97569	0.000100827	0.0116374
ENSG00000198763	MT-ND2	-2.64338	-1.98298	8.54214e-05	0.0136155
ENSG00000198804	MT-CO1	-2.79408	-2.57141	0.0011197	0.00364508
ENSG00000212907	MT-ND4L	-2.48674	-1.87729	0.000289484	0.0224356
ENSG00000209082	J01415.1	-2.52715	-2.16855	0.00123411	0.0117253
ENSG00000198840	MT-ND3	-2.43712	-1.80891	0.000402685	0.0333409
ENSG00000198938	MT-CO3	-2.52801	-2.13353	0.00179345	0.0165004
ENSG00000228253	MT-ATP8	-2.40824	-1.8266	0.000453043	0.0320711
ENSG00000210196	J01415.22	-3.17739	-2.47404	0.000855175	0.00413764
ENSG00000225630	MTND2P28	-2.50577	-1.89297	0.00204748	0.0567388
ENSG00000198712	MT-CO2	-2.28165	-1.74311	0.00344569	0.0849642
ENSG00000225972	MTND1P23	-2.67205	-2.31059	0.00121131	0.00930606
ENSG00000210154	J01415.13	-2.64348	-2.40005	0.00551623	0.00884584
ENSG00000210194	J01415.20	-3.06259	-2.52531	0.00283545	0.0204858
ENSG00000210107	J01415.5	-2.81197	-2.12564	0.0053027	0.0428124
ENSG00000210195	J01415.21	-3.74879	-2.734	0.00318133	0.0207079
ENSG00000210156	J01415.14	-2.37386	-2.01374	0.0241488	0.0841484
ENSG00000210176	J01415.17	-2.70844	-2.0421	0.0207283	0.0974939
ENSG00000259045	RP11-320M16.1	-2.47759	-7.52656	0.241184	0.00266064
ENSG00000210191	J01415.19	-2.69424	-1.83136	0.0192065	0.185768
ENSG00000210049	J01415.2	-1.4822	-1.68341	0.265811	0.101164
ENSG00000255123	MTND5P21	-8.58064	-3.27927	0.0045683	0.0893137
ENSG00000210164	J01415.15	-2.52466	-1.89506	0.0251073	0.165814
ENSG00000232373	MTCYBP3	-5.07165	-5.35035	0.00656071	0.00389212
ENSG00000210184	J01415.18	-2.86234	-1.9188	0.017689	0.172003
ENSG00000230225	MTND5P14	-4.36575	-3.26	0.0156848	0.0552567
ENSG00000236254	MTND4P14	-2.23126	-6.68739	0.330996	0.00549888
ENSG00000198744	RP5-857K21.11	-1.86116	-1.81764	0.160511	0.139816
ENSG00000244921	CTB-36O1.7	-2.56662	-3.4167	0.14875	0.0242676
ENSG00000253504	RP11-593P24.2	-4.43793	-11.5048	0.0935959	0.00849235
ENSG00000210127	J01415.8	-2.29677	-1.68236	0.064067	0.274313
ENSG00000228995	MTND1P9	-3.48145	-3.26089	0.0832774	0.0639101
ENSG00000235917	RP11-39K24.14	-4.52201	-5.13347	0.126177	0.132751
ENSG00000210117	J01415.7	-2.67013	-2.04578	0.0289301	0.147988
ENSG00000250169	MTND5P13	-4.22944	-1.77232	0.00970871	0.581457
ENSG00000229622	MTND5P2	-5.87437	-3.4063	0.0294926	0.126429
ENSG00000210100	J01415.4	-2.93204	-2.38197	0.033442	0.0703198
ENSG00000262902	RP11-750B16.1	-2.49265	-2.91498	0.130711	0.0829817
ENSG00000235080	MTND5P23	-6.15174	-2.45858	0.0287722	0.332846
ENSG00000229344	RP5-857K21.7	-4.25631	-2.84034	0.0360491	0.152308
ENSG00000210174	J01415.16	-2.31614	-1.7872	0.0797375	0.24338
ENSG00000239648	MTND1P3	-2.8931	-7.17331	0.322269	0.0351708
ENSG00000254384	MTND6P19	-15.9334	-5.40339	0.0446893	0.219237
ENSG00000224083	RP11-39K24.4	-1.71656	-2.3632	0.411136	0.0713902
ENSG00000232177	MTND4P24	-8.28269	-1.82141	0.0798305	0.75894
ENSG00000237542	AC009960.5	-2.69095	-4.22004	0.329856	0.0975646
ENSG00000228725	MTND2P12	-3.25008	-3.19845	0.107251	0.0745439
ENSG00000236007	AC105921.5	-4.50037	-4.09001	0.156365	0.268679
ENSG00000229031	RP11-666G4.1	-2.11203	-1.95222	0.194082	0.283007
ENSG00000248136	MTND6P8	-3.73624	-2.62471	0.190264	0.378986
ENSG00000227788	AC012363.8	-6.89938	-5.27768	0.0743861	0.128027
ENSG00000249770	MTND6P17	-3.00483	-2.74873	0.447896	0.433405
ENSG00000229690	MTCO2P1	-5.59242	-5.60848	0.201402	0.19157
ENSG00000232196	MTRNR2L4	-1.90606	-2.61287	0.327701	0.111285
ENSG00000260161	CTD-2588J6.1	-2.46587	-2.10503	0.373806	0.605793
ENSG00000248548	MTND4P8	-6.0052	-2.83979	0.11947	0.504791
ENSG00000247627	MTND4P12	1.12351	1.42246	1	0.919535
ENSG00000232772	MTND4P22	-2.28459	-3.80047	0.42947	0.17322

## Sheet: Nuclear OxPhos
Genes	ENSEMBL	P2 FC	P3 FC	P2 FDR	P3 FDR
NDUFAB1	ENSG00000004779	2.45824	2.04974	0.000291031	0.0114285
COX10	ENSG00000006695	1.25395	1.24525	0.75839	0.821212
UQCRC1	ENSG00000010256	1.54745	1.92244	0.135164	0.00887116
COX15	ENSG00000014919	1.44282	1.37742	0.186139	0.287311
NDUFS1	ENSG00000023228	1.48477	1.57184	0.108535	0.0533082
NDUFB4	ENSG00000065518	2.27959	2.29182	0.000112556	5.92968e-05
SDHA	ENSG00000073578	1.06963	1.31096	1	0.365272
NDUFB2	ENSG00000090266	1.97973	1.41764	0.000291187	0.170213
ATP5D	ENSG00000099624	2.09986	2.24474	0.0033894	0.000675127
NDUFB7	ENSG00000099795	1.98187	1.96743	0.0109423	0.00923381
NDUFC1	ENSG00000109390	1.4655	1.6738	0.388412	0.157502
NDUFS8	ENSG00000110717	2.26274	2.07289	1.00142e-05	7.83577e-05
ATP5B	ENSG00000110955	1.79289	1.91128	0.0554743	0.02379
COX6A1	ENSG00000111775	1.87119	1.90347	0.0233353	0.0163294
COX7A2	ENSG00000112695	1.799	1.58749	0.0422886	0.115599
NDUFS7	ENSG00000115286	1.11499	1.26439	1	0.562705
ATP5F1	ENSG00000116459	1.59186	1.68759	0.0892081	0.037783
SDHB	ENSG00000117118	2.35773	2.02161	0.000686721	0.0101992
NDUFB3	ENSG00000119013	2.01134	1.8881	0.050144	0.0614758
NDUFA8	ENSG00000119421	1.74244	1.97808	0.0239577	0.00179029
ATPAF1	ENSG00000123472	1.17697	1.13209	0.714189	0.861156
ATP5S	ENSG00000125375	1.04085	-1.06841	1	1
COX6B1	ENSG00000126267	1.64692	1.97843	0.121731	0.0113386
COX7C	ENSG00000127184	1.94107	1.947	0.013643	0.0102045
NDUFA5	ENSG00000128609	-1.47112	-1.02504	0.498492	1
ECSIT	ENSG00000130159	-1.0852	1.46678	1	0.218336
NDUFA10	ENSG00000130414	1.15413	1.2855	0.835166	0.417833
COX4I2	ENSG00000131055	-1.25697	-1.33143	1	1
COX4I1	ENSG00000131143	1.6907	1.89216	0.0472042	0.00612774
NDUFA2	ENSG00000131495	1.86757	1.95533	0.00144572	0.000196314
ATP5G2	ENSG00000135390	1.21068	1.2797	0.630534	0.375714
COX5B	ENSG00000135940	1.66925	1.85696	0.146406	0.0388908
NDUFB5	ENSG00000136521	1.47764	1.53299	0.0800007	0.0488277
NDUFAF1	ENSG00000137806	1.16448	1.43512	0.960473	0.370734
COX17	ENSG00000138495	2.81965	2.86611	6.1271e-06	2.22551e-06
NDUFA9	ENSG00000139180	2.21904	1.75703	1.78389e-05	0.012623
UQCRC2	ENSG00000140740	1.48383	-1.11793	0.264187	1
NDUFB10	ENSG00000140990	1.47111	1.67321	0.282529	0.0741568
SDHC	ENSG00000143252	2.07087	1.99473	0.00356147	0.00645322
NDUFS6	ENSG00000145494	1.82088	2.50537	0.0141765	6.47901e-06
NDUFB9	ENSG00000147684	1.66414	1.96491	0.0679223	0.00431441
SURF1	ENSG00000148290	2.42648	2.83489	0.00275409	0.000185027
NDUFC2	ENSG00000151366	2.15282	2.06904	0.00015284	0.000425386
NUBPL	ENSG00000151413	1.10508	-1.13406	0.990677	0.912388
ATP5A1	ENSG00000152234	1.35465	1.50425	0.341707	0.118932
ATP5G3	ENSG00000154518	1.64769	1.49374	0.0643699	0.174997
ATP5J	ENSG00000154723	1.87556	1.687	0.00655474	0.0323443
COX6A2	ENSG00000156885	11.8579	5.76896	0.0915478	0.288351
NDUFS2	ENSG00000158864	1.30721	1.34919	0.359657	0.258141
ATP5G1	ENSG00000159199	1.95071	2.08331	0.00966023	0.00183075
NDUFV3	ENSG00000160194	1.63946	1.73278	0.0105604	0.00384301
COX6B2	ENSG00000160471	-3.89057	-2.38816	0.0197025	0.127699
COX7A1	ENSG00000161281	2.12009	2.25106	0.0173968	0.00774404
COX18	ENSG00000163626	-1.27397	-1.38626	0.662217	0.424068
NDUFAF2	ENSG00000164182	1.65642	1.9622	0.107298	0.0116976
NDUFS4	ENSG00000164258	1.96631	2.05664	0.00708045	0.00158558
UQCRQ	ENSG00000164405	2.662	2.55448	9.3015e-06	1.31167e-05
COX6C	ENSG00000164919	1.2783	1.14853	0.736085	1
NDUFB6	ENSG00000165264	1.59476	1.8311	0.209077	0.0508612
ATP5C1	ENSG00000165629	1.5828	1.49715	0.100127	0.146287
NDUFB8	ENSG00000166136	1.74505	1.64539	0.0913053	0.137724
COX11	ENSG00000166260	1.56761	1.0728	0.0711181	1
PHB	ENSG00000167085	1.64261	1.83998	0.0413745	0.00485534
NDUFV1	ENSG00000167792	1.53467	1.52604	0.135014	0.106449
ATP5H	ENSG00000167863	1.52584	1.80446	0.0558457	0.00125705
NDUFS5	ENSG00000168653	1.53225	1.62194	0.156398	0.0693401
ATP5I	ENSG00000169020	2.54781	2.38537	1.86223e-06	1.36193e-05
UQCRFS1	ENSG00000169021	1.77629	2.21548	0.0252427	0.000164488
NDUFA3	ENSG00000170906	1.18507	1.4027	0.829007	0.280768
ATPAF2	ENSG00000171953	1.51385	1.14827	0.429288	1
CYCS	ENSG00000172115	2.34319	2.80602	7.12885e-06	8.22832e-10
UQCRH	ENSG00000173660	1.80565	1.83189	0.0114619	0.00586617
NDUFA11	ENSG00000174886	2.00098	2.36132	0.00067965	1.91319e-06
COX8A	ENSG00000176340	2.32029	2.36316	0.0110082	0.00748276
NDUFV2	ENSG00000178127	1.51603	1.42801	0.167425	0.250755
COX5A	ENSG00000178741	1.95945	2.07248	0.0269798	0.00935487
CYC1	ENSG00000179091	2.02076	2.37294	0.0466332	0.00456051
NDUFA12	ENSG00000184752	2.15856	2.24455	0.00159892	0.000512199
NDUFA6	ENSG00000184983	1.88637	1.87972	0.00393777	0.0028181
NDUFA13	ENSG00000186010	2.73281	2.96338	0.000165154	2.61059e-05
NDUFA4	ENSG00000189043	2.0644	1.97785	0.00118653	0.00250818
SDHD	ENSG00000204370	1.48901	1.38518	0.243054	0.351304
NDUFS3	ENSG00000213619	1.77748	1.73449	0.00491519	0.0109528
ATP5J2	ENSG00000241468	2.30803	1.98487	0.000459515	0.00678896
ATP5O	ENSG00000241837	1.8	1.55521	0.0492676	0.195145
NDUFA7	ENSG00000267855	1.48053	1.25249	0.115903	0.527026
C8orf38	#N/A	#N/A	#N/A	#N/A	#N/A
UCRC	#N/A	#N/A	#N/A	#N/A	#N/A
C6orf66	#N/A	#N/A	#N/A	#N/A	#N/A
LOC727947	#N/A	#N/A	#N/A	#N/A	#N/A
UQCR	#N/A	#N/A	#N/A	#N/A	#N/A
